# Supplementary material for: Integrins
Source: PubMed Central journal article supplement — Cell Tissue Res. 2009 Aug 20;339(1):269–80. doi: 10.1007/s00441-009-0834-6 (PMC2784866; doi:10.1007/s00441-009-0834-6), 2009-08-20
Supplement: 441_2009_834_MOESM1_ESM.pdf [file 441_2009_834_MOESM1_ESM.pdf]

# Integrins at a Glance

Malgorzata Barczyk, Sergio Carracedo and Donald Gullberg

1

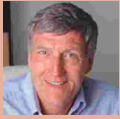

Erkki Ruoslahti

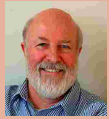

Richard O. Hynes

2

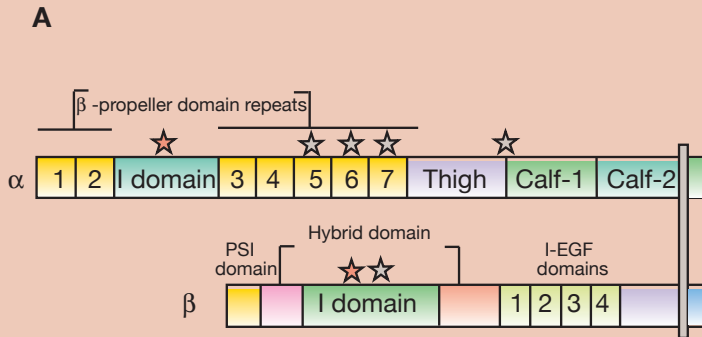

4

| Integrin                            | Human $\alpha$ chain characteristics                         | Cleavage | $\alpha$ I | Prototypic ligands/ recognition sequences                                                                             | Additional ligands       |
|-------------------------------------|--------------------------------------------------------------|----------|------------|-----------------------------------------------------------------------------------------------------------------------|--------------------------|
| $\alpha 1 \beta 1$ (CD49a, VLA1)    | 1151 aa                                                      |          | X          | collagens (collagen IV > collagen I (GFOGER); collagen IX)                                                            | semaphorin 7A            |
| $\alpha 2 \beta 1$ (CD49b, VLA2)    | 1181 aa                                                      |          | X          | collagens (collagen I > collagen IV (GFOGER); collagen IX)                                                            | E-cadherin, endorepellin |
| $\alpha 3 \beta 1$ (CD49c, VLA3)    | 1051 aa, splice variants $\alpha 3 A$ and $\alpha 3 B$       | X        |            | lamins (LN-511>LN-332>LN-211)                                                                                         |                          |
| $\alpha 4 \beta 1$ (CD49d, VLA4)    | 1038 aa                                                      |          |            | fibronectin, VCAM-1                                                                                                   |                          |
| $\alpha 5 \beta 1$ (CD49e, VLA5)    | 1049 aa                                                      | X        |            | fibronectin (RGD)                                                                                                     | endostatin               |
| $\alpha 6 \beta 1$ (CD49f, VLA6)    | 1073 aa, splice variants $\alpha 6 A$ and $\alpha 6 B$       | X        |            | lamins (LN-511>LN-332>LN-111>LN-411)                                                                                  |                          |
| $\alpha 7 \beta 1$                  | 1137 aa, splice variants X1, X2, $\alpha 7 A$ , $\alpha 7 B$ | X        |            | $\alpha 7 X1 \beta 1$ : lamins (LN-511>LN-211>LN-411>LN-111)<br>$\alpha 7 X2 \beta 1$ : lamins (LN-111>LN-211>LN-511) |                          |
| $\alpha 8 \beta 1$                  | 1025 aa                                                      | X        |            | fibronectin, vitronectin, nephronectin (RGD)                                                                          |                          |
| $\alpha 9 \beta 1$                  | 1035 aa                                                      |          |            | tenascin-C, VEGF-C, VEGF-D                                                                                            |                          |
| $\alpha 10 \beta 1$                 | 1167 aa                                                      |          | X          | collagens (collagen IV>collagen VI >collagen II (GFOGER); collagen IX)                                                |                          |
| $\alpha 11 \beta 1$                 | 1188 aa, inserted domain 21 aa                               | X        |            | collagens (collagen I>collagen IV (GFOGER); collagen IX)                                                              |                          |
| $\alpha L \beta 2$ (CD11a)          | 1170 aa                                                      | X        |            | ICAM-1, -2, -3, -5                                                                                                    |                          |
| $\alpha M \beta 2$ (CD11b)          | 1153 aa                                                      | X        |            | iC3b, fibrinogen + more                                                                                               |                          |
| $\alpha X \beta 2$ (CD11c)          | 1163 aa                                                      | X        |            | iC3b, fibrinogen + more                                                                                               |                          |
| $\alpha D \beta 2$ (CD11d)          | 1162 aa                                                      | X        |            | ICAM-3, VCAM-1                                                                                                        |                          |
| $\alpha II B \beta 3$ (CD41, Gp11b) | 1039 aa                                                      | X        |            | fibronectin, fibronectin (RGD)                                                                                        |                          |
| $\alpha 6 \beta 4$                  |                                                              | X        |            | lamins (LN-332, LN-511)                                                                                               |                          |
| $\alpha v \beta 1$ (CD51)           | 1048 aa                                                      | X        |            | fibronectin, vitronectin (RGD)                                                                                        |                          |
| $\alpha v \beta 3$                  |                                                              | X        |            | vitronectin, fibronectin, fibrinogen (RGD)                                                                            | tumstatin                |
| $\alpha v \beta 5$                  |                                                              | X        |            | vitronectin (RGD)                                                                                                     |                          |
| $\alpha v \beta 6$                  |                                                              | X        |            | fibronectin, TGF- $\beta$ -LAP (RGD)                                                                                  |                          |
| $\alpha v \beta 8$                  |                                                              | X        |            | vitronectin, TGF- $\beta$ -LAP (RGD)                                                                                  |                          |
| $\alpha E \beta 7$ (CD103, HML-1)   | 1178 aa                                                      | X        | X          | E-cadherin                                                                                                            |                          |
| $\alpha 4 \beta 7$                  |                                                              |          |            | MadCAM-1, fibronectin, VCAM-1                                                                                         |                          |

3

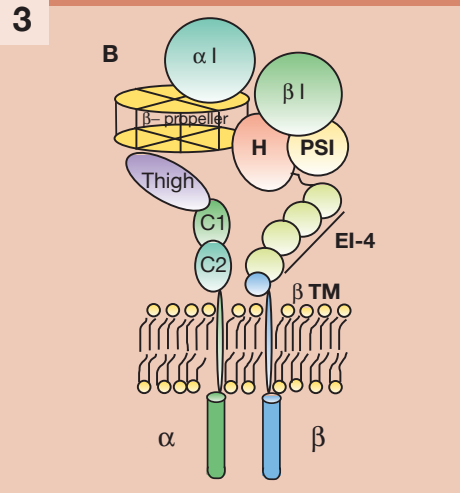

5

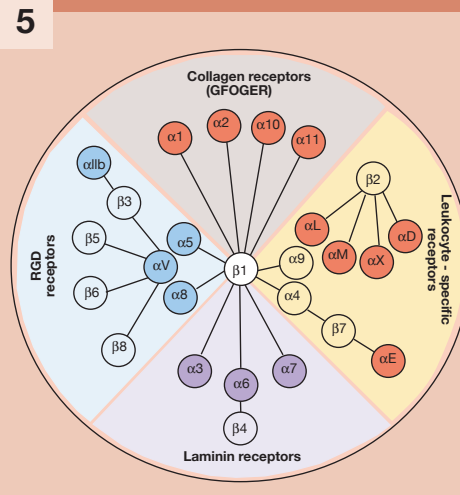

6

| Integrin     | Viability | Unchallenged mutant phenotype                                                                                                                                                                                 | Challenged mutant phenotype                                                                                                                                                                           |
|--------------|-----------|---------------------------------------------------------------------------------------------------------------------------------------------------------------------------------------------------------------|-------------------------------------------------------------------------------------------------------------------------------------------------------------------------------------------------------|
| $\alpha 1$   | +         | No phenotype. Cell adhesion defect to collagen IV.                                                                                                                                                            | Reduced tumor angiogenesis, increased glomerulosclerosis, diminished callus size in bone fracture model, reduced atherosclerosis in ApoE <sup>-/-</sup> mice, reduced psoriasis in xenograft model.   |
| $\alpha 2$   | +         | Mild mammary gland branching morphogenesis phenotype. Platelet, fibroblast, and keratinocyte adhesion defect to collagen I.                                                                                   | Reduced angiogenesis in tumor and wound healing models, reduced innate immune response to peritoneal <i>Listeria</i> infection, reduced thrombi formation increased embolization in thrombosis model. |
| $\alpha 10$  | +         | Mild cartilage defect.                                                                                                                                                                                        |                                                                                                                                                                                                       |
| $\alpha 11$  | +         | Incisor eruption defect.                                                                                                                                                                                      |                                                                                                                                                                                                       |
| $\alpha 3$   | +/-       | Defects of kidney and submandibular gland, decreased bronchial branching of the lungs, skin blisters, abnormal layering of the cerebral cortex.                                                               | Faster wound healing in a Cre-model.                                                                                                                                                                  |
| $\alpha 6$   | +/-       | Severe blistering of the skin and other epithelia, absence of hemidesmosomes, altered laminin deposition in the brain, and ectopic neuroblastic outgrowths on the brain and in the eye. Mutants die at birth. |                                                                                                                                                                                                       |
| $\alpha 7$   | - or +    | Embryonic vasculature defect, cerebral hemorrhage, and placenta defects. Muscular dystrophy in adult mice.                                                                                                    | Fibrotic muscle tissue when crossed with mdx mice. Protective role in exercise-induced muscle injury.                                                                                                 |
| $\alpha 5$   | -         | Severe defects in posterior trunk and yolk sac mesodermal structures, lack of epithelialization of somites, reduced numbers of Schwann cells and embryonic lethality at E10-E11.                              |                                                                                                                                                                                                       |
| $\alpha 8$   | +/-       | Absent or reduced kidneys and abnormal steriosilia in the inner ear.                                                                                                                                          |                                                                                                                                                                                                       |
| $\alpha v$   | - or +/-  | Placental defects and intracerebral, intestinal hemorrhages and cleft palate. Death varies from midgestation to perinatal.                                                                                    |                                                                                                                                                                                                       |
| $\alpha IIB$ | +         | Bleeding disorder, lack of platelet binding to fibrinogen, absence of fibrinogen in platelet alpha granules, and increased numbers of hematopoietic progenitors in yolk sac, fetal liver, and bone marrow.    |                                                                                                                                                                                                       |
| $\alpha 4$   | -         | Embryonic lethality either due to failure of chorioallantoic fusion or cardiac abnormalities including defects in epicardium formation.                                                                       |                                                                                                                                                                                                       |
| $\alpha 9$   | +/-       | Bilateral chylothorax causing death within 14 days.                                                                                                                                                           | Altered cutaneous wound healing in wound model.                                                                                                                                                       |
| $\alpha L$   | +         | Reduced immune response, defects in neutrophil adhesion to endothelium, and in osteoclast adhesion.                                                                                                           | Reduced leukocyte adhesion in TNF- $\alpha$ induced inflammation.                                                                                                                                     |
| $\alpha M$   | +         | Reduced immune response, reduced neutrophil adhesion to fibrinogen and reduced degranulation of neutrophils.                                                                                                  | Reduced T-cell proliferative response to Staphylococcal enterotoxin, reduced wound healing, reduced cerebral ischemia, reduced encephalomyelitis, reduced melanoma rejection.                         |
| $\alpha X$   | +         | Reduced immune response.                                                                                                                                                                                      |                                                                                                                                                                                                       |
| $\alpha D$   | +         | Reduced immune response.                                                                                                                                                                                      |                                                                                                                                                                                                       |
| $\alpha E$   | +         | Reduced number of intestinal and vaginal interepithelial lymphocytes, skin inflammation.                                                                                                                      | Reduced experimental colitis.                                                                                                                                                                         |
| $\beta 1$    | -         | Null mutants die soon after implantation due to inner cell mass defects in blastocysts.                                                                                                                       |                                                                                                                                                                                                       |
| $\beta 2$    | +         | Leukocyte adhesion deficiency with immune, hematopoietic and skeleton defects.                                                                                                                                | Reduced listeriosis.                                                                                                                                                                                  |
| $\beta 3$    | - or +    | Platelet defects, extended bleeding times, cutaneous and gastrointestinal bleeding, anemia, increased bone mass, hypocalcemia, reduced survival, and placental defects associated with some fetal loss.       | Enhanced wound healing.                                                                                                                                                                               |
| $\beta 4$    | +/-       | Extensive detachment of epidermis and other squamous epithelia. Stratified tissues lack hemidesmosomes and simple epithelia are also defective in adherence.                                                  |                                                                                                                                                                                                       |
| $\beta 5$    | +         | Age-related blindness due to defective retinal phagocytosis. Cell adhesion defect of keratinocytes to vitronectin.                                                                                            | Reduced lung injury in a ventilator-induced model.                                                                                                                                                    |
| $\beta 6$    | +         | Baldness associated with macrophage infiltration of skin and exaggerated pulmonary inflammation.                                                                                                              | Reduced fibrosis in a bleomycin-induced lung model, impaired mucosal mast cell response to nematode infection, reduced wound healing, increased periodontal infection.                                |
| $\beta 7$    | +         | Hypoplasia of gut-associated lymph tissue due to defects in lymphocyte migration.                                                                                                                             |                                                                                                                                                                                                       |
| $\beta 8$    | + or +/-  | Death either at midgestation (E11.5) as a result of circulatory abnormalities in the placenta, or the days around birth due to intracerebral hemorrhaging.                                                    |                                                                                                                                                                                                       |
